# Supplementary material
Source: HighWire-hosted journal article supplement (https://spcare.bmj.com/content/8/3/314)
Supplement: inline-supplementary-material-1 [file inline-supplementary-material-1.pdf]

## **Appendix – Supplementary file**

This supplementary file is provided by the authors to give readers additional information about their study “*Patterns of end-of-life care among hospitalised patients with haematological malignancies*”.

**Table A1 – Categorisation of haematological malignancies**

| <b>Haematological disease</b> | <b>ICD-10 codes</b>                                    |
|-------------------------------|--------------------------------------------------------|
| Acute leukemia                | C91.0, C92.0, C92.3, C92.4, C93.0, C94.0, C94.2, C95.0 |
| Chronic lymphoid leukemia     | C91.1                                                  |
| Chronic myeloid leukemia      | C92.1, C92.2                                           |
| Hodgkin's lymphoma            | C81                                                    |
| Multiple myeloma              | C90                                                    |
| Myelodysplastic syndromes     | D46                                                    |
| Non-Hodgkin's lymphoma        | C82, C83, C84, C85, C88.0                              |

**Table A2 – Sex- and age-standardized prevalence of comorbidities in hospitalized patients with haematological malignancies near the end of life**

|                                                               | Total study population | Acute leukaemia  | Chronic lymphoid leukaemia | Chronic myeloid leukaemia | Hodgkin's lymphoma | Multiple myeloma | Myelo-dysplastic syndromes | Non-Hodgkin's lymphoma |
|---------------------------------------------------------------|------------------------|------------------|----------------------------|---------------------------|--------------------|------------------|----------------------------|------------------------|
|                                                               | <i>n</i> =46,629       | <i>n</i> =11,531 | <i>n</i> =4,161            | <i>n</i> =1,157           | <i>n</i> =1,022    | <i>n</i> =8,803  | <i>n</i> =6,693            | <i>n</i> =13,262       |
| <b>Mean number of other chronic conditions</b>                |                        |                  |                            |                           |                    |                  |                            |                        |
| Mean (SD) <sup>a</sup>                                        | 1.1 (1.2)              | 0.8 (1.0)        | 1.2 (1.2)                  | 1.4 (1.4)                 | 1.2 (1.3)          | 1.2 (1.2)        | 1.5 (1.4)                  | 1.0 (1.1)              |
| <b>Prevalence of other chronic conditions (%)<sup>b</sup></b> |                        |                  |                            |                           |                    |                  |                            |                        |
| Acute Myocardial Infarction                                   | 3.3%                   | 2.5%             | 3.7%                       | 6.3%                      | 5.1%               | 3.0%             | 4.5%                       | 3.2%                   |
| Heart Failure                                                 | 25.8%                  | 18.7%            | 28.5%                      | 34.0%                     | 31.9%              | 29.5%            | 36.7%                      | 22.1%                  |
| Peripheral Vascular Disease                                   | 5.6%                   | 3.9%             | 6.4%                       | 9.7%                      | 7.0%               | 4.2%             | 9.2%                       | 5.4%                   |
| Cerebrovascular Accident                                      | 8.9%                   | 9.1%             | 9.9%                       | 13.3%                     | 10.4%              | 7.1%             | 12.0%                      | 7.5%                   |
| Dementia                                                      | 7.6%                   | 5.1%             | 9.4%                       | 8.5%                      | 8.9%               | 7.8%             | 10.7%                      | 7.3%                   |
| Pulmonary Diseases                                            | 8.8%                   | 6.2%             | 11.9%                      | 11.4%                     | 11.2%              | 8.3%             | 12.4%                      | 8.2%                   |
| Connective Tissue Disorders                                   | 1.4%                   | 1.1%             | 1.0%                       | 1.7%                      | 1.6%               | 0.9%             | 2.5%                       | 1.4%                   |
| Peptic Ulcer                                                  | 2.0%                   | 0.9%             | 1.6%                       | 1.7%                      | 2.6%               | 2.1%             | 2.5%                       | 2.7%                   |
| Liver diseases                                                | 4.3%                   | 2.7%             | 3.8%                       | 5.7%                      | 4.5%               | 2.6%             | 9.2%                       | 4.4%                   |
| Diabetes                                                      | 15.6%                  | 13.3%            | 17.9%                      | 18.1%                     | 16.1%              | 13.0%            | 20.1%                      | 16.2%                  |
| Paraplegia                                                    | 4.9%                   | 2.5%             | 5.4%                       | 5.6%                      | 5.6%               | 5.4%             | 4.5%                       | 6.6%                   |
| Renal failure                                                 | 16.2%                  | 8.4%             | 13.8%                      | 19.6%                     | 12.1%              | 30.0%            | 20.8%                      | 12.3%                  |
| HIV                                                           | 0.5%                   | 0.1%             | 0.1%                       | 0.2%                      | 1.3%               | 0.3%             | 0.4%                       | 1.2%                   |

*Sex- and age-standardized percentages, using the total study population as reference.*

*SD= standard deviation*

<sup>a</sup> *p*<0.001 (Wilcoxon rank sum test)

<sup>b</sup> *p*<0.001 (Pearson's chi-square test)

**Figure A1 - Change in treatment use over the course of the last 3 months of life of hospitalized patients with haematological malignancies**

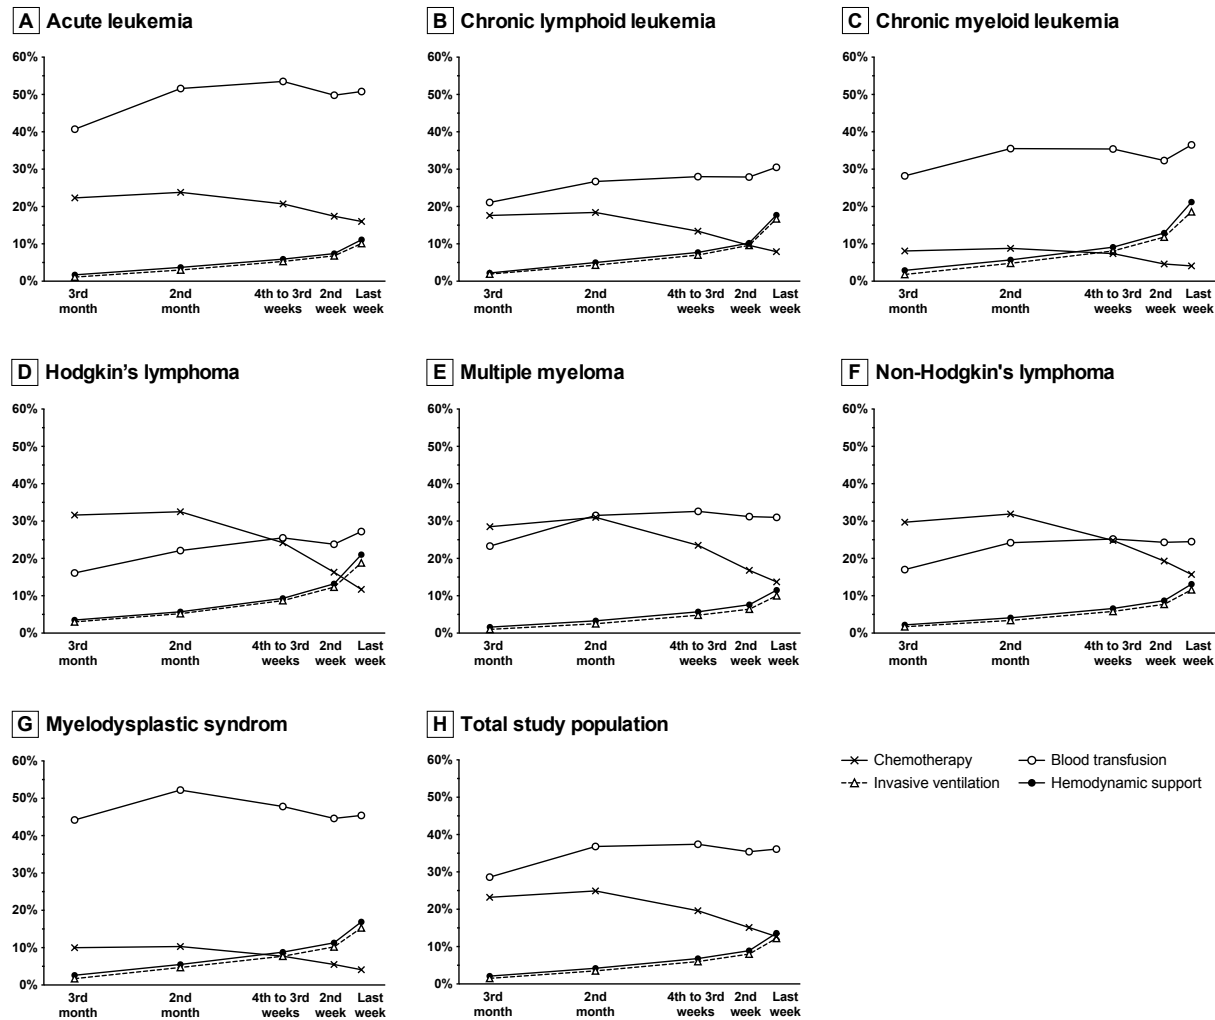

Legend figure A1: Sex- and age-standardized proportions, using the total study population as reference

**Table A3 – Change in treatment use over the course of the last 3 months before death of hospitalized patients with haematological malignancies**

|                                                       | Total study population | Acute leukaemia    | Chronic lymphoid leukaemia | Chronic myeloid leukaemia | Hodgkin's lymphoma | Multiple myeloma   | Myelo-dysplastic syndromes | Non-Hodgkin's lymphoma |
|-------------------------------------------------------|------------------------|--------------------|----------------------------|---------------------------|--------------------|--------------------|----------------------------|------------------------|
|                                                       | <i>n</i> =46,629       | <i>n</i> =11,531   | <i>n</i> =4,161            | <i>n</i> =1,157           | <i>n</i> =1,022    | <i>n</i> =8,803    | <i>n</i> =6,693            | <i>n</i> =13,262       |
|                                                       | n (%)                  | n (%) <sup>a</sup> | n (%) <sup>a</sup>         | n (%) <sup>a</sup>        | n (%) <sup>a</sup> | n (%) <sup>a</sup> | n (%) <sup>a</sup>         | n (%) <sup>a</sup>     |
| <b>Chemotherapy</b>                                   |                        |                    |                            |                           |                    |                    |                            |                        |
| 3 <sup>rd</sup> month before death                    | 11,071 (23.7)          | 2,563 (22.2)       | 746 (17.9)                 | 92 (7.9)                  | 323 (31.6)         | 2,516 (28.6)       | 670 (10.0)                 | 3,948 (29.8)           |
| 2 <sup>nd</sup> month before death                    | 11,790 (25.3)          | 2,736 (23.7)       | 766 (18.4)                 | 98 (8.5)                  | 332 (32.5)         | 2,732 (31.0)       | 693 (10.4)                 | 4,234 (31.9)           |
| 4 <sup>th</sup> to 3 <sup>rd</sup> weeks before death | 9,353 (20.1)           | 2,389 (20.7)       | 561 (13.5)                 | 84 (7.3)                  | 248 (24.3)         | 2,075 (23.6)       | 519 (7.8)                  | 3,289 (24.8)           |
| 2 <sup>nd</sup> week before death                     | 7,287 (15.6)           | 2,007 (17.4)       | 394 (9.5)                  | 53 (4.6)                  | 166 (16.2)         | 1,481 (16.8)       | 366 (5.5)                  | 2,547 (19.2)           |
| Last week before death                                | 6,144 (13.2)           | 1,847 (16.0)       | 329 (7.9)                  | 47 (4.0)                  | 118 (11.6)         | 1,199 (13.6)       | 278 (4.2)                  | 2,071 (15.6)           |
| <b>Blood transfusion</b>                              |                        |                    |                            |                           |                    |                    |                            |                        |
| 3 <sup>rd</sup> month before death                    | 13,380 (28.7)          | 4,697 (40.7)       | 874 (21.0)                 | 328 (28.3)                | 167 (16.3)         | 2,035 (23.1)       | 2,943 (44.0)               | 2,273 (17.1)           |
| 2 <sup>nd</sup> month before death                    | 17,220 (36.9)          | 5,945 (51.6)       | 1,117 (26.8)               | 412 (35.6)                | 226 (22.1)         | 2,764 (31.4)       | 3,483 (52.0)               | 3,223 (24.3)           |
| 4 <sup>th</sup> to 3 <sup>rd</sup> weeks before death | 17,435 (37.4)          | 6,178 (53.6)       | 1,169 (28.1)               | 409 (35.3)                | 260 (25.5)         | 2,871 (32.6)       | 3,184 (47.6)               | 3,347 (25.2)           |
| 2 <sup>nd</sup> week before death                     | 16,478 (35.3)          | 5,748 (49.9)       | 1,161 (27.9)               | 373 (32.3)                | 242 (23.6)         | 2,747 (31.2)       | 2,977 (44.5)               | 3,233 (24.4)           |
| Last week before death                                | 16,832 (36.1)          | 5,861 (50.8)       | 1,266 (30.4)               | 421 (36.4)                | 277 (27.1)         | 2,733 (31.0)       | 3,030 (45.3)               | 3,256 (24.5)           |
| <b>Invasive ventilation</b>                           |                        |                    |                            |                           |                    |                    |                            |                        |
| 3 <sup>rd</sup> month before death                    | 675 (1.4)              | 130 (1.1)          | 74 (1.8)                   | 24 (2.1)                  | 31 (3.0)           | 91 (1.0)           | 112 (1.7)                  | 222 (1.7)              |
| 2 <sup>nd</sup> month before death                    | 1,564 (3.4)            | 339 (2.9)          | 178 (4.3)                  | 57 (4.9)                  | 53 (5.2)           | 221 (2.5)          | 312 (4.7)                  | 448 (3.4)              |
| 4 <sup>th</sup> to 3 <sup>rd</sup> weeks before death | 2,777 (6.0)            | 614 (5.3)          | 287 (6.9)                  | 92 (7.9)                  | 88 (8.6)           | 429 (4.9)          | 514 (7.7)                  | 762 (5.7)              |
| 2 <sup>nd</sup> week before death                     | 3,675 (7.9)            | 780 (6.8)          | 390 (9.4)                  | 135 (11.6)                | 125 (12.2)         | 577 (6.6)          | 680 (10.2)                 | 1,025 (7.7)            |
| Last week before death                                | 5,610 (12.0)           | 1,167 (10.1)       | 680 (16.3)                 | 214 (18.5)                | 193 (18.8)         | 889 (10.1)         | 1,026 (15.3)               | 1,532 (11.5)           |
| <b>Hemodynamic support</b>                            |                        |                    |                            |                           |                    |                    |                            |                        |
| 3 <sup>rd</sup> month before death                    | 929 (2.0)              | 194 (1.7)          | 83 (2.0)                   | 33 (2.9)                  | 36 (3.5)           | 144 (1.6)          | 173 (2.6)                  | 293 (2.2)              |
| 2 <sup>nd</sup> month before death                    | 1,924 (4.1)            | 430 (3.7)          | 205 (4.9)                  | 64 (5.5)                  | 57 (5.5)           | 294 (3.3)          | 366 (5.5)                  | 540 (4.1)              |
| 4 <sup>th</sup> to 3 <sup>rd</sup> weeks before death | 3,142 (6.7)            | 685 (5.9)          | 315 (7.6)                  | 103 (8.9)                 | 93 (9.1)           | 510 (5.8)          | 585 (8.7)                  | 870 (6.6)              |
| 2 <sup>nd</sup> week before death                     | 4,099 (8.8)            | 856 (7.4)          | 414 (10.0)                 | 147 (12.7)                | 132 (12.9)         | 684 (7.8)          | 754 (11.3)                 | 1,147 (8.6)            |
| Last week before death                                | 6,281 (13.5)           | 1,281 (11.1)       | 723 (17.4)                 | 244 (21.1)                | 212 (20.7)         | 1,032 (11.7)       | 1,131 (16.9)               | 1,724 (13)             |

<sup>a</sup> Sex- and age-standardized values, using the total study population as reference
